## RESEARCH ARTICLE

# Accumulation and excretion of manganese ion in the kidney of *Mytilus galloprovincialis*

Hidefumi Wakashin<sup>1</sup>, Eriko Seo<sup>2</sup> and Yoshiteru Seo<sup>1,\*</sup>

## ABSTRACT

$T_1$ -weighted magnetic resonance imaging ( $T_{1w}$ -MRI) was employed to detect the accumulation of manganese ion ( $Mn^{2+}$ ) in urine in the kidney of the mussel *Mytilus galloprovincialis*, and the longitudinal relaxation rates ( $1/T_1=R_1$ ) were measured. When the mussel was exposed to seawater containing  $10 \mu\text{mol l}^{-1} Mn^{2+}$ , the  $T_{1w}$ -MRI intensity and  $R_1$  of the kidney, stomach and digestive glands were increased.  $Mn^{2+}$  might be taken into the hemolymph via the gastrointestinal tract, and then filtrated into the pericardium via the auricles. Although the image intensity in the pericardium was not affected by manganese, an image intensity enhancement was observed in the distal part of the renopericardial communication canals between the pericardium and the kidneys, indicating  $Mn^{2+}$  was concentrated in the excretion pathway. As the seawater  $Mn^{2+}$  concentration ( $[Mn^{2+}]_{SW}$ ) was increased from 3 to  $50 \mu\text{mol l}^{-1}$ ,  $R_1$  of the kidney ( $R_{1K}$ ) was elevated. When the mussels were immersed in  $3\text{--}10 \mu\text{mol l}^{-1} [Mn^{2+}]_{SW}$  for 24 h, the  $Mn^{2+}$  concentration in the kidney ( $[Mn^{2+}]_K$ ) showed a 15-fold increase compared with the ambient  $[Mn^{2+}]_{SW}$ . In the range of  $[Mn^{2+}]_{SW}$  from 10 to  $50 \mu\text{mol l}^{-1}$ ,  $R_{1K}$  reached a plateau level that corresponded to  $200 \mu\text{mol l}^{-1} [Mn^{2+}]_K$ . As  $[Mn^{2+}]_K$  fell transiently, voluntary excretion of urine from the kidney was assumed. The decreases in intensity were not synchronized between the right and left kidneys, and the closure of the shells might not be essential for urinary excretion. The voluntary excretion suggested an additional explanation for the large range in metal concentrations in the kidneys of the mussel.

**KEY WORDS:** Nephridia, Heavy metal,  $T_1$  relaxation time, Magnetic resonance imaging

## INTRODUCTION

The excretion system of mussels consists of kidneys and the pericardium (Martin and Harrison, 1966; Bayne, 1976). Hemolymph is filtered by the auricular wall in the heart (Andrews and Jennings, 1993). Secretion, absorption and storage might be attributed to the kidneys (Martin and Harrison, 1966; Bayne, 1976). In freshwater bivalves, the excretion of hypo-osmotic urine was reported as a means to maintain the osmolality of body fluid. For example, the salt concentration in the final urine is approximately half of the pericardial filtrate (Picken, 1937), and the absorption of chloride and calcium have been detected in *Anodonta* (Florin and

Duchâteau, 1948). Meanwhile, it is known that marine bivalves are euryhaline (Robertson, 1964). It has been shown that the concentration of electrolytes in the hemolymph of *Mytilus* were virtually in equilibrium with the external medium (Robertson, 1953). It has been considered that the function of osmoregulation, such as the dilution or concentration of urine, is very limited, and even  $NH_3/NH_4^+$  was not enriched in *Mytilus* (Bayne, 1976; Thomsen et al., 2016). Intensive studies have been focused on the accumulation of heavy metal ions such as cadmium, copper, mercury and manganese in bivalves, and the kidney is one of the marked organs that accumulate metals (Bayne, 1976). These studies have been conducted using *in vitro* techniques such as chemical and histochemical analysis (George et al., 1982), autoradiography (Soto and Cajaraville, 1966), X-ray microanalysis and atomic absorption spectroscopy (Carmichael et al., 1979). As far as we know, no time-resolved *in vivo* studies have been performed to elucidate the mechanism of the accumulation of heavy metals in the kidney, mainly owing to technical limitations.

In our previous report, we applied a magnetic resonance imaging (MRI) method in a study of the mussel *Mytilus galloprovincialis*, and also estimated the filtration volume through the auricles of the heart, and determined the direction of the flow of hemolymph in the renopericardial canal (Seo et al., 2014a). The image contrast of MRI is determined mainly by the longitudinal relaxation time ( $T_1$ ) and the spin-lattice relaxation time ( $T_2$ ). The  $T_1$  relaxation rate ( $1/T_1=R_1$ ) is the exponential decay constant of the magnetic moment of the  $^1H$  nuclei of water. The nominal  $R_1$  value for seawater is approximately  $0.5 \text{ s}^{-1}$ . Some of the heavy metals are paramagnetic, such as the manganese ion ( $Mn^{2+}$ ), which could accelerate  $T_1$  relaxation. Thus, when  $Mn^{2+}$  is added to seawater, the  $R_1$  is increased, depending on the concentration. Therefore,  $R_1$  in the kidney should be increased when  $Mn^{2+}$  is concentrated in the kidney. In order to test this hypothesis, we (1) measured  $T_1$ -weighted MRI ( $T_{1w}$ -MRI) signals and  $R_1$  of the urine in the kidney of mussels enhanced by  $Mn^{2+}$ , and (2) evaluated the relationship between the  $Mn^{2+}$  concentration and  $R_1$  of the urine in the kidney. We also examined the (3) time-dependent  $R_1$  value changes shown by urine in the kidney using three-dimensional  $T_{1w}$ -MRI. The results suggested voluntary excretion of urine from the kidney of mussels.

## MATERIALS AND METHODS

### Experimental mussels

The *Mytilus galloprovincialis* Lamarck 1819 used in this study were supplied by Hamasui Co., Ltd (Hiroshima, Japan). These mussels were collected from a subtidal zone and cultivated using a floating suspended culture off the shore of Miyajima, Hiroshima, in April and July 2015. At the laboratory, in two separate 5 liter baths, 10 mussels were kept in each bath for a week in aerated synthetic seawater (salinity 36‰) at room temperature ( $20\text{--}24^\circ\text{C}$ ) (Seo et al., 2014b). A total of 15 mussels were used in this MRI study. The length of the mussels was  $35.7\pm 0.6 \text{ mm}$  (mean $\pm$ s.e.m.). All of the

<sup>1</sup>Department of Regulatory Physiology, Dokkyo Medical University School of Medicine, Tochigi 321-0293, Japan. <sup>2</sup>Department of Marine Ecosystem Dynamics, Division of Marine Life Science, Atmosphere and Ocean Research Institute, The University of Tokyo, Kashiwa 277-8564, Japan.

\*Author for correspondence (yseo@dokkyomed.ac.jp)

 E.S., 0000-0003-0879-9083; Y.S., 0000-0001-9775-4738

**List of symbols and abbreviations**

|                      |                                                                                                   |
|----------------------|---------------------------------------------------------------------------------------------------|
| AV                   | auriculoventricular                                                                               |
| FOV                  | field of view                                                                                     |
| H&E                  | hematoxylin & eosin                                                                               |
| K                    | relaxivity value of Mn <sup>2+</sup>                                                              |
| K <sub>M</sub>       | stability constant of metal complex                                                               |
| MRI                  | magnetic resonance imaging                                                                        |
| PFA                  | paraformaldehyde                                                                                  |
| R <sub>1</sub>       | longitudinal relaxation rate (1/T <sub>1</sub> )                                                  |
| T <sub>1</sub>       | longitudinal relaxation time                                                                      |
| T <sub>2</sub>       | spin-lattice relaxation time                                                                      |
| T <sub>1w</sub> -MRI | T <sub>1</sub> -weighted gradient-echo magnetic resonance imaging                                 |
| T <sub>2w</sub> -MRI | T <sub>2</sub> -weighted rapid acquisition with relaxation enhancement magnetic resonance imaging |
| T <sub>E</sub>       | echo time                                                                                         |
| T <sub>R</sub>       | relaxation delay                                                                                  |
| θ                    | flip angle                                                                                        |

animal experiments in this study were carried out under the rules and regulations of the ‘Guiding Principles for the Care and Use of Animals’ set by the Physiological Society of Japan, and approved by the Animal Research Councils at Dokkyo University School of Medicine.

**Magnetic resonance imaging**

The MRI examination of the *M. galloprovincialis* in this study used procedures noted in previous reports (Seo et al., 2014a, 2016). In brief, the mussels were placed in a plastic tube (inner diameter of 22.5 mm), and each mussel was positioned in place using a piece of elastic silicone strip that was inserted at the hinge position of the shell. The mussels were immersed in 15 ml of synthetic seawater without aeration, and the temperature was kept at 20°C. Seawater was exchangeable through another tube set in the bottom of the tube holding the mussel. The <sup>1</sup>H MR images were obtained by a 7 T MRI system (AVANCE III, Bruker Biospin, Ettlingen, Baden-Württemberg, Germany) and equipped with an active shielded gradient (micro2.5) and a 25-mm <sup>1</sup>H birdcage radiofrequency coil.

T<sub>1</sub> relaxation time was measured by a two-dimensional saturation-recovery imaging method with five relaxation delays from 0.1 s to 4 s. The pixel size was 190×190 μm and the slice thickness was 1 mm. The total image acquisition time was 9 min 21 s. In order to take in the whole structure of the kidney, three-dimensional T<sub>1</sub>-weighted gradient-echo imaging (3D T<sub>1w</sub>-MRI) was used. The typical parameters used were a voxel size of 190×190×190 μm, a combination of T<sub>R</sub>/T<sub>E</sub>/θ=50 ms/3 ms/45 deg, where T<sub>R</sub>, T<sub>E</sub> and θ are relaxation delay, echo time and flip angle, respectively, and the total image acquisition time was 31 min. The time-lapse MR signal in the kidney was analyzed by 3D T<sub>1w</sub>-MRI with a voxel size of 380×380×380 μm, and a combination of T<sub>R</sub>/T<sub>E</sub>/θ=50 ms/2.5 ms/45 deg. Three-dimensional images were obtained every 3 min 24 s. In the histological examinations, high-resolution 3D T<sub>2</sub>-weighted rapid acquisition with relaxation enhancement imaging (3D T<sub>2w</sub>-MRI) was employed, with a voxel size of 60×60×60 μm, with a combination of T<sub>R</sub>/T<sub>E</sub>/RARE-factor=1500 ms/30 ms/8, where RARE-factor is the number of phase-encoding steps per single excitation, and the 3D T<sub>1w</sub>-MRI was measured with a voxel size of 60×60×60 μm with a combination of T<sub>R</sub>/T<sub>E</sub>=100 ms/4 ms. The increase in the T<sub>1w</sub>-MR image intensity (ΔI) was calculated as follows:

$$\Delta I = M/M_C - 1, \quad (1)$$

where M<sub>C</sub> is an average of the image intensity (M) of four images before Mn<sup>2+</sup> exposure.

The T<sub>1</sub> values of the MnCl<sub>2</sub> solutions (1.2–6 mmol l<sup>-1</sup>) were measured by inversion recovery pulse sequences with a 10-mm <sup>1</sup>H coil at 22°C. The relaxivity of Mn<sup>2+</sup> was calculated from the slope of a linear regression line [6.3 l (s mmol)<sup>-1</sup>].

**Histology**

All of the mussels were fixed with 4% paraformaldehyde (PFA) for the histological examinations, and embedded in paraffin wax after dehydration. The paraffin sections were prepared using a slice thickness of 10 μm. The sections were stained with hematoxylin & eosin (H&E). Images were captured and combined using a microscope (BZ-9000, Keyence, Osaka, Japan) with an image-stitching mode.

**RESULTS****Accumulation of manganese ion in the kidney of *M. galloprovincialis***

First, we reviewed the anatomy of *M. galloprovincialis* using MRI images and light microscopic analysis. The orientation of the organs are shown in a transverse MRI image obtained 3 mm posterior from the auriculoventricular valve (Fig. 1A). The kidneys were located on the dorsal side of the gill, on the inner side of the anterior oblique vein, and on the ventral side of the posterior retractor muscles. The shape of the kidney wall was lobular, and some parts were adjacent to the venous wall with no interstitial space (Fig. 1A–C). In order for a mussel to excrete urine, it is thought that the excretory pore opens to the upper mantle cavity connecting to the exhalant siphon (Fig. 1B). The excretory pore consisted of a short duct surrounded by muscular tissue (Fig. 1C). The kidneys were connected with the pericardium through the renopericardial canal. The renopericardial canal and the anterior oblique vein run side by side (Fig. 1D). Some parts of the wall of the renopericardial canal were lobular and parallel with the anterior oblique vein with no interstitial space (Fig. 1E). The structure of the kidney, heart and adjacent vessels were illustrated in a schematic diagram (Fig. 1F).

Next, we examined the distribution of a heavy metal, manganese ion, in the mussels using MRI. In the mussels fixed with PFA, the anatomical structure of the kidney was detected in the T<sub>1w</sub>-MR images (Fig. 2A), but in the living mussels, it was difficult to identify the kidney because T<sub>1</sub> relaxation rate (R<sub>1</sub>) values of kidney (0.551±0.035 s<sup>-1</sup>; mean±s.e.m, n=28) were similar to those of surrounding tissues and seawater (Table 1, Fig. 2B). When a live mussel was immersed in 300 ml aerated seawater containing 50 μmol l<sup>-1</sup> MnCl<sub>2</sub>, the kidneys and digestive organs were depicted at a higher signal intensity (Fig. 2C). The R<sub>1</sub> of the kidney transiently increased for 2–10 h, then decreased at 24 h of exposure to Mn<sup>2+</sup> (1.83±0.132 s<sup>-1</sup>, n=14; Table 1). In a separate experiment, R<sub>1</sub> of the kidney was maintained at almost the same level after 50 h of exposure to Mn<sup>2+</sup> (1.81±0.301 s<sup>-1</sup>, n=4). When the mussel was returned to normal seawater, the R<sub>1</sub> of the kidney decreased slowly, and returned to the control level at 72 h (Table 1). Therefore, *M. galloprovincialis* seemed to concentrate Mn<sup>2+</sup> in the kidney from the surrounding seawater, and seemed to excrete Mn<sup>2+</sup> from the kidney.

Considering these results, the T<sub>1w</sub>-MR image of the kidney seemed to be contrasted by the accumulated manganese ion. However, it is known that T<sub>1w</sub>-MR image intensity is affected by flow, such as the circulation of body fluids (Bock et al., 2001; Seo et al., 2014b). In order to eliminate the effect of flow in the kidney, the mussel was anesthetized using 4% MgCl<sub>2</sub>. In a transverse image of the region around the heart, the kidneys and gastrointestinal tract were depicted at a higher signal intensity compared with the PFA fixation, but without Mn<sup>2+</sup>, similar to Fig. 2A (Fig. 3A). After the application of 50 μmol l<sup>-1</sup> Mn<sup>2+</sup>, the pericardium, ventricle and

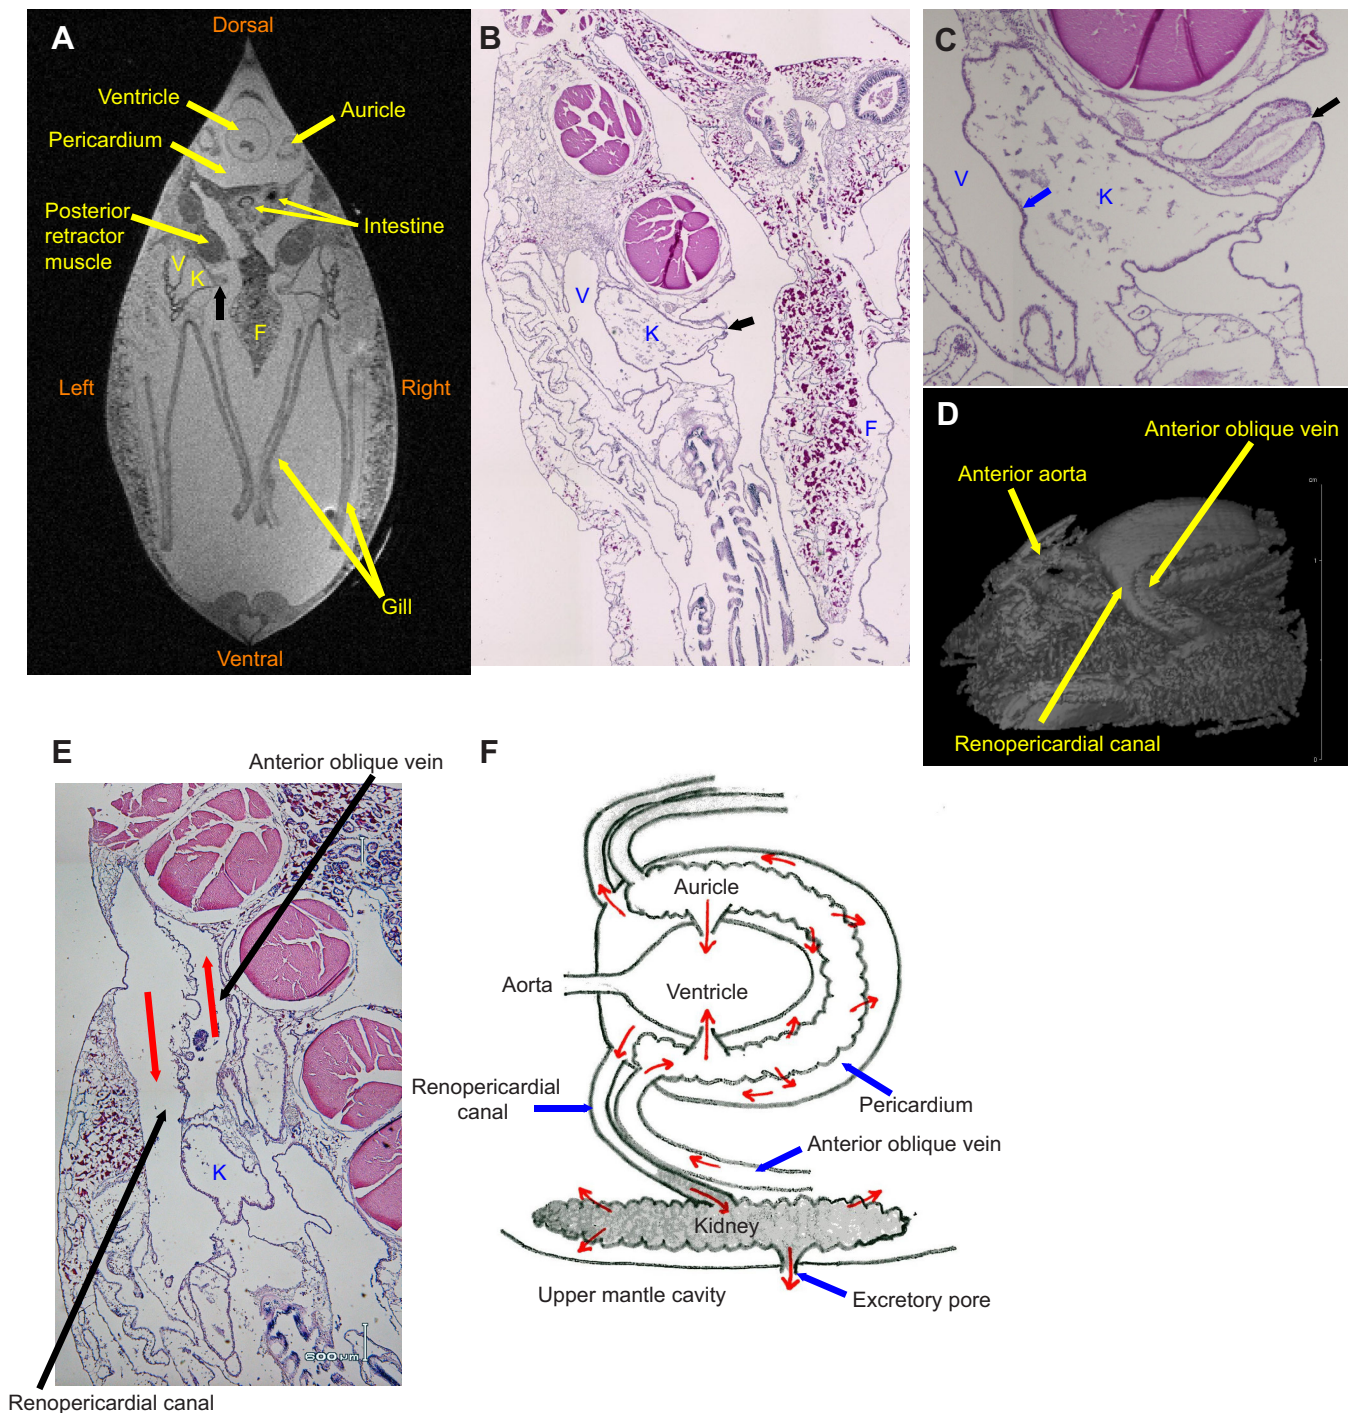

**Fig. 1. Anatomical structure of the kidneys of *Mytilus galloprovincialis*.** (A) Transverse  $T_{2w}$ -MR image of *M. galloprovincialis* fixed by paraformaldehyde (PFA) at 3 mm posterior from the auriculoventricular (AV) valves. (B) Transverse image of hematoxylin & eosin (H&E) staining corresponding to panel A. (C) Transverse image of H&E staining around the excretory pore surrounded by muscular tissues. (D) A 3D reconstructed image of the heart and adjacent vessels. (E) Transverse images of H&E staining at the renopericardial canal and the anterior oblique vein. (F) Schematic diagram of the kidneys, heart and adjacent vessels. The gray area indicates the kidneys and renopericardial canals contrasted by  $Mn^{2+}$ . Labeled features: K, kidneys; V, anterior oblique vein; F, foot. The black arrows in A–C indicate the excretory pores of the kidneys. The blue arrow in C indicates a wall between the kidneys and the vein. The red arrows in E and F indicate the direction of flow.

auricles of the heart were not enhanced, but the kidneys were clearly contrasted (Fig. 3B). These results indicated the  $T_{1w}$ -MRI signal intensity in the kidneys was not affected by the flow. The 3D reconstructed image of the kidneys showed the whole structure of the kidneys in the same condition as shown in Fig. 3B (Fig. 3C; Movie 1). The anterior–posterior lengths of the right and left

kidneys were 16.6 mm and 15 mm, respectively, and the volumes of the right and left kidneys were 24  $\mu$ l and 14  $\mu$ l, respectively. It is interesting to note that the pericardial canals were depicted from the middle of the canal to the kidneys, leading to the speculation that the renopericardial canals might participate in the concentration of manganese ion (\* in Figs 3C and 1F).

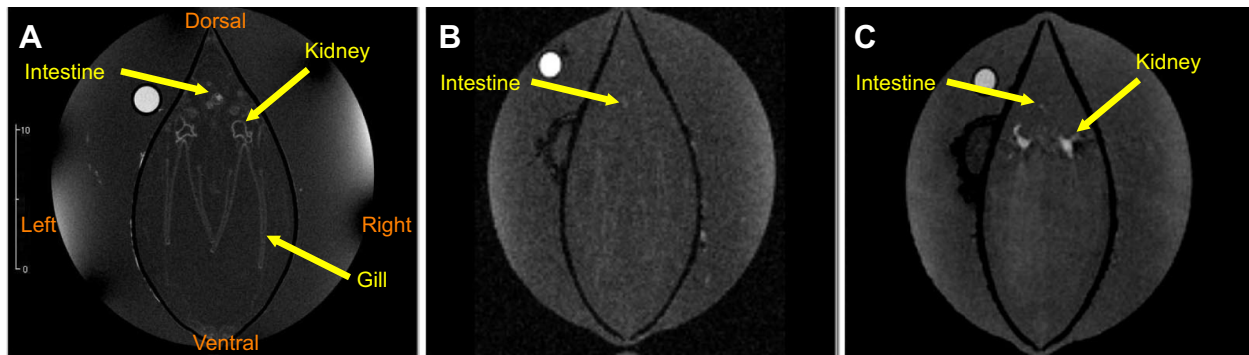

**Fig. 2. Manganese uptake of the kidneys of *M. galloprovincialis*.** (A) Transverse  $T_{1w}$ -MR image of *M. galloprovincialis* fixed by PFA 4 mm posterior to the AV valves. (B) Transverse  $T_{1w}$ -MR image of a living *M. galloprovincialis* before the addition of  $Mn^{2+}$ . (C) Transverse  $T_{1w}$ -MR image after 24 h of exposure to seawater containing  $50 \mu\text{mol l}^{-1} Mn^{2+}$  at  $20^\circ\text{C}$ .

### Concentration of manganese ion in the kidneys of *M. galloprovincialis*

In order to detect the concentration dependency of  $Mn^{2+}$  accumulation, the mussels were immersed in seawater containing 1 to  $50 \mu\text{mol l}^{-1} MnCl_2$ . The  $R_1$  values of the kidneys were measured before and 24 h after the exposure to the  $MnCl_2$ , because  $R_1$  values were stable from 24 to 50 h of  $Mn^{2+}$  exposure. As shown in Fig. 4A,  $R_1$  was  $MnCl_2$  concentration dependent and elevated, and significantly increased at  $3 \mu\text{mol l}^{-1}$  and above, reaching a plateau level at over  $10 \mu\text{mol l}^{-1}$  (around  $1.6 \text{ s}^{-1}$ ). The  $R_1$  value depends on the concentration of  $Mn^{2+}$  ( $[Mn^{2+}]$ ) as follows:

$$R_1 = R_0 + K \cdot [Mn^{2+}], \quad (2)$$

where  $R_0$  is the intrinsic  $R_1$  of the urine and  $K$  is the relaxivity value of  $Mn^{2+}$  [ $6.3 \text{ l (s mmol)}^{-1}$ ]. Fig. 4B shows the  $[Mn^{2+}]$  in the kidneys, which was estimated by the  $R_1$  values. The maximum  $[Mn^{2+}]$  was 15-fold higher in the kidneys compared with the ambient  $[Mn^{2+}]$  in seawater, which was less than  $10 \mu\text{mol l}^{-1} Mn^{2+}$ . At the same time, the fold change of  $Mn^{2+}$  concentration was decreased at values higher than  $10 \mu\text{mol l}^{-1} Mn^{2+}$  in seawater.

### Time-lapse analysis of manganese ion in the kidneys of *M. galloprovincialis*

In order to analyze the initial increasing phase of the  $[Mn^{2+}]$  in the kidney, the accumulation of  $Mn^{2+}$  in the kidneys was measured using 24 kidneys of 12 mussels. The  $T_{1w}$ -MR image intensity of the

**Table 1.  $T_1$  relaxation rate ( $R_1$ ) of urine in the kidney of *Mytilus galloprovincialis* and manganese concentration ( $[Mn^{2+}]$ ) estimated from  $R_1$  before, during and after  $50 \mu\text{mol l}^{-1} Mn^{2+}$  exposure**

| Condition                                  | $R_1$ ( $\text{s}^{-1}$ )   | $[Mn^{2+}]$ ( $\mu\text{mol l}^{-1}$ ) |
|--------------------------------------------|-----------------------------|----------------------------------------|
| Control seawater                           | $0.551 \pm 0.034$ (28)      |                                        |
| $50 \mu\text{mol l}^{-1} Mn^{2+}$ seawater |                             |                                        |
| 2–4 h                                      | $2.405 \pm 0.208^*$ (6)     | $294 \pm 38$                           |
| 8–10 h                                     | $2.879 \pm 0.256^*$ (6)     | $370 \pm 47$                           |
| 24 h                                       | $1.825 \pm 0.132^{*+}$ (14) | $202 \pm 24$                           |
| Back to control seawater                   |                             |                                        |
| 1–2 h                                      | $1.073 \pm 0.086^*$ (6)     | $83 \pm 16$                            |
| 24 h                                       | $0.861 \pm 0.096^*$ (10)    | $49 \pm 18$                            |
| 72 h                                       | $0.482 \pm 0.033$ (8)       | $-11 \pm 6$                            |

The asterisks indicate a significant increase in  $R_1$  compared with that before  $Mn^{2+}$  exposure (two-tailed  $t$ -test,  $*P < 0.01$ ). The double dagger represents a statistically significant decrease in  $R_1$  compared with values at 2–4 h and 8–10 h ( $^\ddagger P < 0.01$ ). The number in parenthesis is the number of kidneys. The  $R_1$  of the control seawater was  $0.494 \pm 0.124 \text{ s}^{-1}$  (14), showing no significant difference compared with  $R_1$  of the kidney in the control seawater ( $P > 0.01$ ).

kidneys was continuously/linearly increased for the first 2 h in 12 kidneys of eight mussels. A typical result is shown in Fig. 5A and Movie 2-1. When the normal seawater was replaced by seawater containing  $Mn^{2+}$ , the signal intensity of the stomach increased instantaneously, which was then followed by the increase in the kidneys after a delay of a few minutes. The rate of increase of the signal intensity was constant, and the rates in the respective kidneys were similar to each other. As shown in the sagittal image of the left kidney (Movie 3), the signal intensity increased in the same pattern as seen in the long axis of the kidney. The image intensity of the seawater increased a bit owing to the  $10 \mu\text{mol l}^{-1} Mn^{2+}$ , then decreased gradually owing to uptake of  $Mn^{2+}$  into the mussel. The MR signals in the soft tissues were constant, except for the digestive organs, such as the stomach and the intestine. Because the increase of the  $T_{1w}$ -MR image intensity with a short echo time was proportional to the  $Mn^{2+}$  concentration (Fig. S1), the  $[Mn^{2+}]$  in the kidneys was estimated by the acquired MR image intensity. The means  $\pm$  s.e.m for 12 kidneys are shown in Fig. 5D. The initial increase rate of  $[Mn^{2+}]$  in the kidney ( $4.83 \pm 0.58 \mu\text{mol l}^{-1} \text{ min}^{-1}$ ,  $n=12$ ) was calculated from the slope of the regression line of  $[Mn^{2+}]$  at 10–40 min. A linear regression line of the increase in  $[Mn^{2+}]$  was determined by the increase in  $[Mn^{2+}]$  at 10–40 min, and the intercept to time axis was defined as the initial delay of  $[Mn^{2+}]$  increase in the kidney ( $8.16 \pm 0.44 \text{ min}$ ,  $n=12$ ).

In contrast, in some kidneys, the maximal image intensity of the kidney fell to below  $50 \mu\text{mol l}^{-1}$  and increased again after a short interval. A single intensity fall was observed in six kidneys of five mussels, and one example is shown in Fig. 6 and Movie 2-2. In this experiment, the mussel was immersed in  $10 \mu\text{mol l}^{-1} Mn^{2+}$  seawater for the first 2 h, and thereafter, the  $10 \mu\text{mol l}^{-1} Mn^{2+}$  seawater was replaced by  $20 \mu\text{mol l}^{-1} Mn^{2+}$  seawater. At first,  $[Mn^{2+}]$  in both kidneys increased in the same kinetic pattern, but the  $[Mn^{2+}]$  of the right kidney dropped to almost the basal level at 58 min. Then, the  $[Mn^{2+}]$  of the right kidney started to increase again, and  $[Mn^{2+}]$  increased at a rate similar to that seen in the left kidney. The  $[Mn^{2+}]$  in the right and left kidneys at 120 min was estimated at 200 and  $250 \mu\text{mol l}^{-1}$ , respectively. When the seawater was replaced by  $20 \mu\text{mol l}^{-1} Mn^{2+}$  seawater, the signal intensities in both kidneys dropped significantly. Thereafter, the image intensity increased again instantaneously. The average of the three drops was  $173.5 \pm 26.6 \mu\text{mol l}^{-1}$ . The fraction of residual urine in the kidney could be estimated as a ratio of  $Mn^{2+}$  concentration after and before the drop ( $13.3 \pm 0.3\%$ ).

The rest of the six kidneys of three mussels demonstrated transient falls in  $[Mn^{2+}]$  more than two times. Twelve falls showed

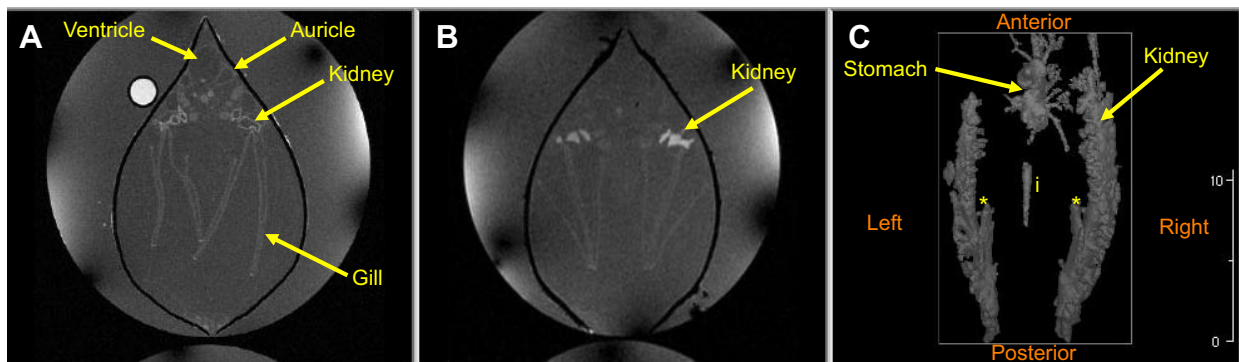

**Fig. 3. Three-dimensional structure of the kidneys of *M. galloprovincialis*.** (A) Transverse  $T_{1w}$ -MR image of *M. galloprovincialis* fixed by PFA 1 mm anterior to the AV valves. (B) Transverse  $T_{1w}$ -MR images of a living *M. galloprovincialis* after 3 weeks of exposure to seawater containing  $50 \mu\text{mol l}^{-1} \text{Mn}^{2+}$  at  $20^\circ\text{C}$ . The mussel was anesthetized by 4%  $\text{MgCl}_2$ . (C) A 3D reconstructed image of the kidneys, stomach and a part of the intestine (i). \* indicates the renopericardial canal. Also see Movie 1.

drops of more than  $75 \mu\text{mol l}^{-1}$  ( $106.2 \pm 7.1 \mu\text{mol l}^{-1}$ ), and the average fraction of residual urine was  $34.5 \pm 5.6\%$ . Typical results are shown in Fig. 7 and Movie 2-3. The right kidney demonstrated

transient falls in  $[\text{Mn}^{2+}]$  of the kidney three times, and the left kidney demonstrated transient falls four times. The falls in  $[\text{Mn}^{2+}]$  were not synchronized between the right and left kidneys. However, the falls in  $[\text{Mn}^{2+}]$  were synchronized between four slices from the posterior side to the anterior side of the kidney.

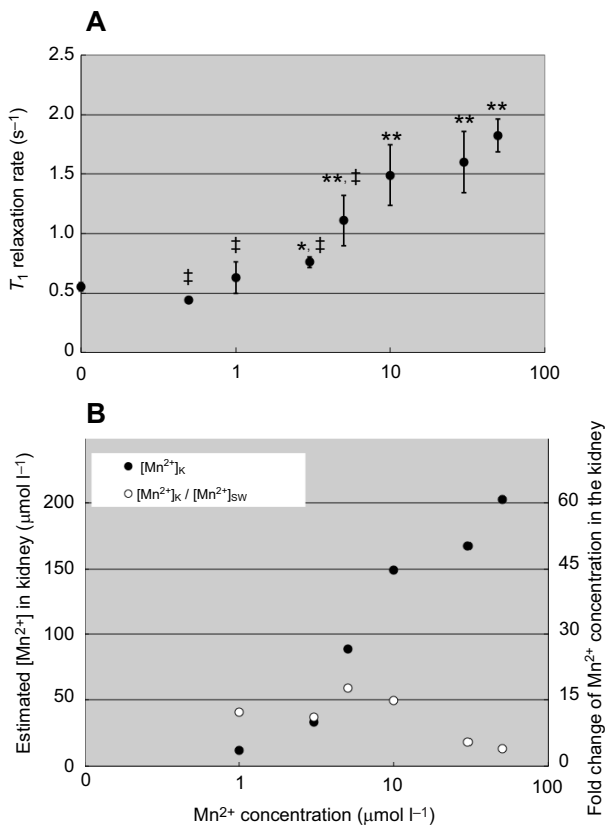

**Fig. 4. Concentration dependency on the uptake of  $\text{Mn}^{2+}$  to the kidneys of *M. galloprovincialis*.** (A) The longitudinal relaxation rate ( $R_1$ ) of the kidneys was measured after 24 h of exposure to seawater containing  $\text{Mn}^{2+}$  at  $20^\circ\text{C}$ . The means  $\pm$  s.e.m. were calculated from four to six kidneys for mussels exposed to  $\text{Mn}^{2+}$ , and also from 28 kidneys before the  $\text{Mn}^{2+}$  exposure. Asterisks represent statistically significant differences in  $R_1$  before and after the  $\text{Mn}^{2+}$  exposure (two-tailed  $t$ -test,  $*P < 0.05$ ,  $**P < 0.01$ ). Double daggers represent statistically significant differences in  $R_1$  compared with  $R_1$  of  $50 \mu\text{mol l}^{-1} \text{Mn}^{2+}$  exposure ( $\dagger P < 0.01$ ). (B) Concentration of  $\text{Mn}^{2+}$  in the kidney ( $[\text{Mn}^{2+}]_k$ ) (filled circles) estimated from the increase in  $R_1$  and the relaxivity of  $\text{Mn}^{2+}$ . Fold change of  $\text{Mn}^{2+}$  concentration in the kidney (open circles) was calculated from  $[\text{Mn}^{2+}]_k / [\text{Mn}^{2+}]_{\text{sw}}$ , where  $[\text{Mn}^{2+}]_{\text{sw}}$  is the  $\text{Mn}^{2+}$  concentration of the seawater.

## DISCUSSION

### Accumulation of manganese in the kidneys of *M. galloprovincialis*

This is the first study to visualize manganese ion accumulation in the urine of kidneys of bivalves using signal enhancement of  $T_{1w}$ -MRI. Because the image intensity and  $R_1$  of the stomach and digestive glands also increased, the  $\text{Mn}^{2+}$  might have been taken from the gastrointestinal tract, and then filtrated into the pericardium by auricles. There were no signal enhancements in the auricles or the pericardium. Therefore, the  $\text{Mn}^{2+}$  was filtrated by the auricular wall, and was not concentrated in the auricles or the pericardium. Accumulation of the  $\text{Mn}^{2+}$  was detected not only in the kidneys, but also in the distal part of the renopericardial canals (\* in Fig. 3C). Consider the following evidence. (1) The walls of the renopericardial canal were attached to the anterior oblique vein, and the wall was a convex surface into the anterior oblique vein (Fig. 1E). This is the same in the wall of auricles that showed a convex surface into the pericardium. (2) Podocytes were distributed in the wall of the anterior oblique vein, and the podocytes faced the renopericardial canal (Pirie and George, 1979). It is supposed that the hemolymph fluid was filtered through the lobular wall into the vein, and then  $\text{Mn}^{2+}$  was concentrated in the kidneys. However, as shown in the sagittal image of the left kidney (Movie 3) and in Fig. 7, the enhanced signal was observed in the long axis of the kidney, but it did not start to increase from the middle of the kidneys. Therefore, the distal part of the renopericardial canal might also function as the kidneys do, and a large surface area might be necessary to reabsorb water and electrolytes, etc. We admit the possibility of back diffusion of  $\text{Mn}^{2+}$  from the kidney, because we could not detect any valve structure in the renopericardial canal or the convoluted funnel (renopericardial funnel) as reported by Pirie and George (1979).

The kidney is composed of a series of highly branched lobules with a single layered columnar epithelium with a brush border, basal nuclei, infolded basal membranes and many membrane-limited granules (Pirie and George, 1979). The kidney is one of the marked organs that accumulate metals such as cadmium (Cd), copper (Cu), mercury (Hg), zinc (Zn) and Mn (Bayne, 1976). Using isolated

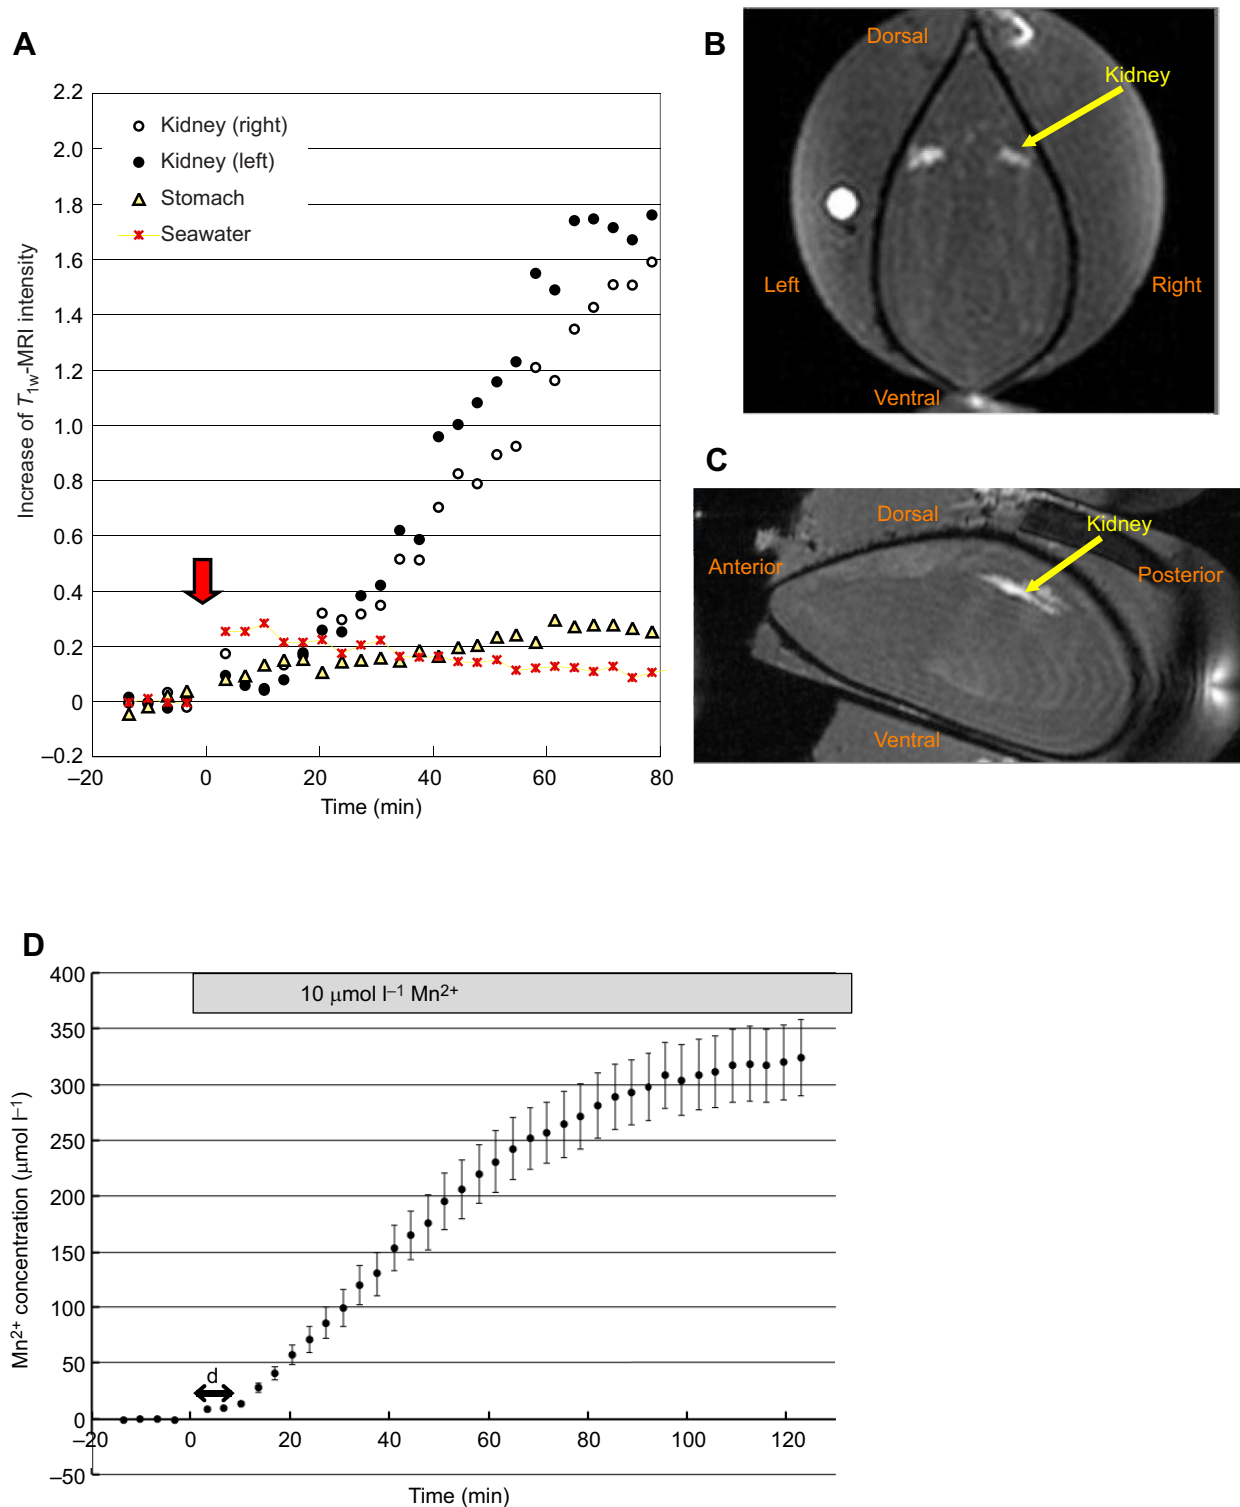

**Fig. 5.** Time-course-dependent changes in the accumulation of  $\text{Mn}^{2+}$  in the kidneys of *M. galloprovincialis*. (A) Changes in image intensity of  $T_{1w}$ -MRI during the exposure of  $10 \mu\text{mol l}^{-1} \text{Mn}^{2+}$  every 3 min 24 s. Red arrow indicates replacement of seawater with that containing  $10 \mu\text{mol l}^{-1} \text{Mn}^{2+}$ . (B) Transverse and (C) sagittal images of the kidneys measured 2 h after the  $10 \mu\text{mol l}^{-1} \text{Mn}^{2+}$  exposure (also see Movies 2-1 and 3, corresponding to B and C, respectively). (D) The mean  $\pm$  s.e.m.  $\text{Mn}^{2+}$  concentration of 12 kidneys showed a continuous increase, estimated from the image intensity. The 'd' indicates the initial delay of the increase in the  $\text{Mn}^{2+}$  concentration ( $8.16 \pm 0.44$  min,  $n=12$ ).

lipofuscin granules of *Mytilus edulis*, stability constants ( $K_M$ ) of  $\text{Cd}^{2+}$  and  $\text{Zn}^{2+}$  were determined to be approximately 5 (George, 1983). Because the  $K_M$  of these ions is smaller than that of the strong chelating compounds, such as EDTA ( $K_M=16.5$ ), the binding of

$\text{Cd}^{2+}$  and  $\text{Zn}^{2+}$  might be reversible depending on the concentration of  $\text{Cd}^{2+}$  and  $\text{Zn}^{2+}$  (George, 1983). For example, the fraction of binding metal for  $K_M=5$  is estimated as 50% at a metal concentration of  $10 \mu\text{mol l}^{-1}$  (Seo et al., 2013). In general, the  $K_M$  for  $\text{Mn}^{2+}$  is

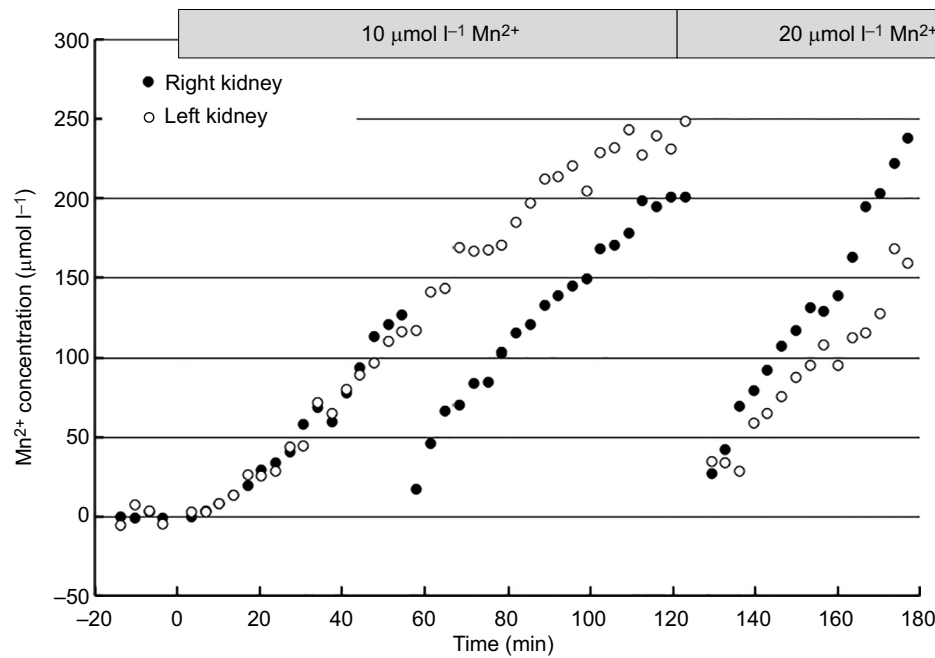

**Fig. 6. Transient changes in  $Mn^{2+}$  in the kidneys of *M. galloprovincialis* associated with closure of the shells.** Changes in  $Mn^{2+}$  concentration in the kidneys calculated from  $T_{1w}$ -MRI image intensity every 3 min 24 s. Normal seawater was replaced with seawater containing  $10 \mu\text{mol l}^{-1} Mn^{2+}$  at 0 min, and with seawater containing  $20 \mu\text{mol l}^{-1} Mn^{2+}$  at 125 min. Also see Movie 2-2.

smaller by 1–2 compared with the  $K_M$  for  $Cd^{2+}$  or  $Zn^{2+}$  (Dojindo Molecular Technologies, Kumamoto, Japan). Therefore, the  $K_M$  for  $Mn^{2+}$  could be approximately 4–3, and chelators could not bind  $Mn^{2+}$  effectively at a  $[Mn^{2+}]$  of less than  $100 \mu\text{mol l}^{-1}$ . In this study, the *M. galloprovincialis* kidney did accumulate  $Mn^{2+}$  in  $3 \mu\text{mol l}^{-1}$  seawater, and the maximum concentration of  $Mn^{2+}$  was  $200 \mu\text{mol l}^{-1}$ , where the  $Mn^{2+}$  concentration in the seawater was higher than  $10 \mu\text{mol l}^{-1}$  (Fig. 4). When the kidneys accumulated  $Mn^{2+}$  at concentrations of

$200 \mu\text{mol l}^{-1}$ , the epithelial cells of the kidneys would uptake  $Mn^{2+}$  easily, so the lipofuscin granules could bind  $Mn^{2+}$  effectively. In the mussel, the toxic concentration of heavy metals in seawater is approximately  $100 \mu\text{mol l}^{-1}$  (Bayne, 1976). In the frog or rat, cardiac function decreased at  $Mn^{2+}$  concentrations of approximately  $100 \mu\text{mol l}^{-1}$  (Seo et al., 2011; Seo et al., 2013; Yang et al., 2006). Therefore,  $200 \mu\text{mol l}^{-1} Mn^{2+}$  might be the maximum concentration at which the kidneys can maintain normal function.

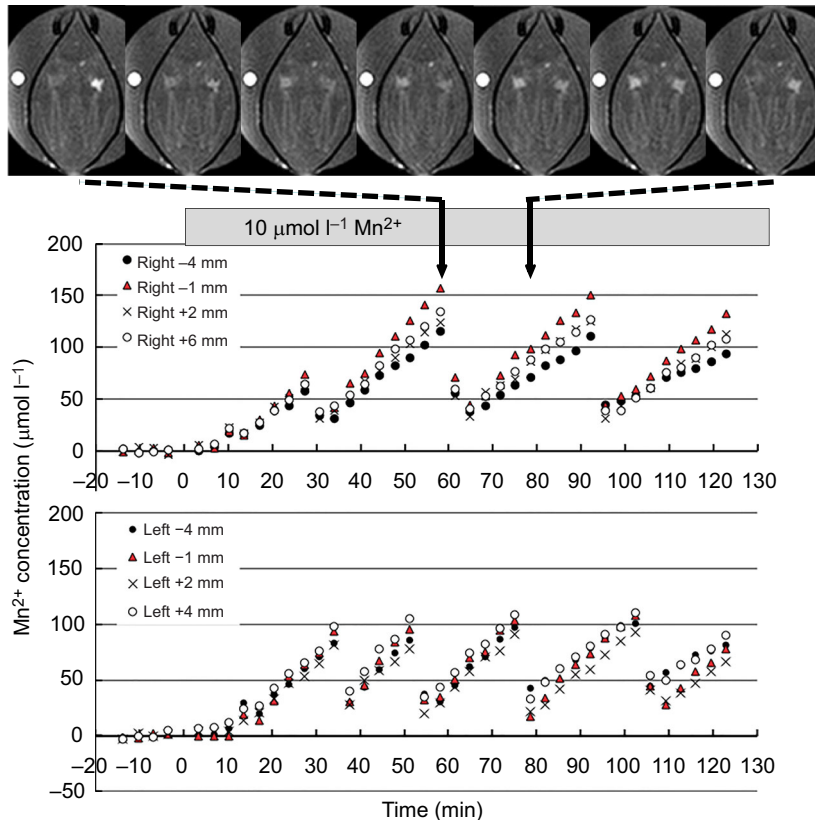

**Fig. 7. Transient changes in  $Mn^{2+}$  in the kidneys of *M. galloprovincialis* without closure of the shells.** Changes in  $Mn^{2+}$  concentration in the kidneys calculated from  $T_{1w}$ -MRI image intensity every 3 min 24 s. Normal seawater was replaced with seawater containing  $10 \mu\text{mol l}^{-1} Mn^{2+}$  at 0 min. The slice positions are shown from the AV valve on the posterior side ( $-4 \text{ mm}$ ) to the anterior side ( $+6 \text{ mm}$ ) of the kidney. The average s.d. of  $[Mn^{2+}]$  was  $20 \mu\text{mol l}^{-1}$  for four slices. Seven images from 58 min to 78.5 min are shown at the top. Also see Movie 2-3.

The accumulation of metals in the mussel has been used for monitoring pollution, and the kidney is typically one of the marked organs. (Bayne, 1976; Julshamn et al., 2001). Typical  $Mn^{2+}$  contents in the kidney was reported as  $6 \mu g g^{-1}$  tissue, which is approximately  $100 \mu mol l^{-1}$  (Julshamn and Andersen, 1983). Because we may expect an increase in  $R_1$  by  $0.6 s^{-1}$ , we could detect  $Mn^{2+}$  pollution by  $T_{1w}$ -MRI of the mussel and could also estimate the  $Mn^{2+}$  concentration from the  $R_1$  of the kidney.

### Voluntary excretion of urine from the kidneys of *M. galloprovincialis*

The *M. galloprovincialis* kidney can concentrate  $Mn^{2+}$ . In other words, the accumulation of  $Mn^{2+}$  increases the toxicity to epithelial cells in the kidneys. As mentioned above, the lipofuscin granules contain the detoxication mechanisms of the mussel. We should also point out that the excretion of the urine from the kidneys is also a useful method to prevent the toxicity of the heavy metal. Anatomically, the kidneys are embedded deeply in the soft tissue, and there is no muscle layer in the wall of the kidney (Fig. 1). Therefore, at first, no one could imagine that the kidneys could excrete the urine instantaneously. As shown in Fig. 6, the right kidney cleared the urine after 58 min, and both kidneys emptied when the seawater in the chamber was replaced. Closure of the shells was associated with both cases where urine excretion was observed (Movie 2-3). These results suggest that *M. galloprovincialis* could excrete urine voluntarily. The presence of muscular tissue in the excretory pore suggested a neural control system (Fig. 1C). However, there are no muscular tissues around the kidneys. Therefore, although the kidney could not contract itself, internal pressure could be increased, possibly by the interstitial pressure, which may be due to closure of the shell by the adductor muscles, and shrinkage of soft tissue by contraction of the retractor muscles in order to minimize residual urine in the kidney (13%). However, as shown in Fig. 7 and Movie 2-3, the shells did not move in seven cases of excretion of the urine. Even when the residual urine in the kidney increased (35%,  $P < 0.01$ ), closure of the shells might not be essential for urine excretion. In contrast, in some mussels, this voluntary excretion of manganese ion from the kidney occurred repeatedly within 2 h, and the timing of excretion was not synchronized in the kidneys on both sides. It is unclear whether this is a physiological process or is due to the toxic effect of the manganese ion. In this study, we did not detect the details of the excretory process because 3D MR images were detected every 3.4 min. Further studies are necessary to document the voluntary excretion of the urine of *M. galloprovincialis*.

In summary, we (1) used  $T_{1w}$ -MRI imaging in *M. galloprovincialis* following  $Mn^{2+}$  exposure, and detected accumulation of  $Mn^{2+}$  in the urine of kidneys, and (2) detected  $Mn^{2+}$  accumulation at a concentration of  $3 \mu mol l^{-1}$   $Mn^{2+}$  in the seawater, and the maximum  $Mn^{2+}$  concentration level in the urine of kidneys was  $200 \mu mol l^{-1}$ . (3) Using 3D  $T_{1w}$ -MRI, the changes in  $Mn^{2+}$  concentration were measured by duration in minutes, and we found that *M. galloprovincialis* can voluntarily excrete the urine. Thus, it is expected that there is an additional explanation for the large range in metal concentrations in the kidneys of *M. edulis* (Lobel et al., 1991). Judging from these results, MRI is a useful technique that holds promise for the future investigation of the function of the kidneys in the mussel.

### Acknowledgements

We offer our sincere thanks to Drs T. Okutani, K. Ohishi and T. Maruyama for providing helpful comments. We would also like to express our thanks to Drs D. Gross, V. Lehman and T. Oerther (Bruker Biospin), as well as Ms Y. Imaizumi-Ohashi and

Ms M. Yokoi-Hayakawa (DSUM) for their technical assistance. We must also thank Prof. S. Kojima (AORI, UT) for his helpful suggestions and encouragement to E.S.

### Competing interests

The authors declare no competing or financial interests.

### Author contributions

Conceptualization: E.S., Y.S.; Methodology: H.W., E.S., Y.S.; Investigation: H.W., E.S., Y.S.; Resources: Y.S.; Writing - original draft: H.W., Y.S.; Writing - review & editing: H.W., E.S., Y.S.

### Funding

Parts of this study were supported by the Japan Society for the Promotion of Science Grant-in-Aid for Scientific Research (KAKENHI) program (JP24659102 and JP15K08185 to Y.S.).

### Supplementary information

Supplementary information available online at <http://jeb.biologists.org/lookup/doi/10.1242/jeb.185439.supplemental>

### References

- Andrews, E. B. and Jennings, K. H. (1993). The anatomical and ultrastructural basis of primary urine formation in bivalve molluscs. *J. Moll. Stud.* **59**, 223-257.
- Bayne, B. L. (1976). *Marine Mussels: their Ecology and Physiology*. Cambridge: Cambridge University Press.
- Bock, C., Frederich, M., Wittig, R.-M. and Pörtner, H.-O. (2001). Simultaneous observations of haemolymph flow and ventilation in marine spider crabs at different temperatures: a flow weighted MRI study. *Magn. Reson. Imaging* **19**, 1113-1124.
- Carmichael, N. G., Squibb, K. S. and Fowler, B. A. (1979). Metals in the molluscan kidney: a comparison of two closely related bivalve species (*Argopecten*), using X-ray microanalysis and atomic absorption spectroscopy. *J. Fish. Res. Board Can.* **36**, 1149-1155.
- Florkin, M. and Duchâteau, G. (1948). Sur l'osmoregulation de l'anodonte (*Anodonta cygnea* L.). *Physiol. Comp. Oecol.* **1**, 29-45.
- George, S. G. (1983). Heavy metal detoxication in *Mytilus* kidney – an *in vitro* study of Cd- and Zn-binding to isolated tertiary lysosomes. *Comp. Biochem. Physiol. C.* **76**, 59-65.
- George, S. G., Coombs, T. L. and Pirie, B. J. S. (1982). Characterization of metal-containing granules from the kidney of the common mussel, *Mytilus edulis*. *Bioch. Biophys. Acta* **716**, 61-71.
- Julshamn, K. and Andersen, K. J. (1983). Subcellular distribution of major and minor elements in unexposed molluscs in western Norway—II. The distribution and binding of cadmium, zinc, copper, magnesium, manganese and iron in the kidney and the digestive system of the common mussel *Mytilus edulis*. *Comp. Biochem. Physiol. A* **75**, 13-16.
- Julshamn, K., Trope, E. K., Børns, C., Sæthre, L. J. and Maage, A. (2001). Cadmium, lead, copper and zinc in blue mussels (*Mytilus edulis*) sampled in the Hardangerfjord, Norway. *J. Environ. Monit* **3**, 539-542.
- Lobel, P. B., Longerich, H. P., Jackson, S. E. and Belkhole, S. P. (1991). A major factor contributing to the high degree of unexplained variability of some elements concentrations in biological tissue: 27 elements in 5 organs of the mussel *Mytilus* as a model. *Arch. Environ. Contam. Toxicol.* **21**, 118-125.
- Martin, A. W. and Harrison, F. M. (1966). Excretion. In *Physiology of Mollusca*, Vol. II (ed. K. M. Wilbur and C. W. Yonge), pp. 353-386. New York and London: Academic Press.
- Picken, L. E. R. (1937). The mechanism of urine formation in invertebrates. *J. Exp. Biol.* **14**, 20-34.
- Pirie, B. J. S. and George, S. G. (1979). Ultrastructure of the heart and excretory system of *Mytilus edulis* (L.). *J. Mar. Biol. Assoc. UK.* **59**, 819-829.
- Robertson, J. D. (1953). Future studies on ionic regulation in marine invertebrates. *J. Exp. Biol.* **30**, 277-296.
- Robertson, J. D. (1964). Osmotic and ionic regulation. In *Physiology of Mollusca*, Vol. I (ed. K. M. Wilbur and C. W. Yonge), pp. 283-311. New York and London: Academic Press.
- Seo, Y., Satoh, K., Watanabe, K., Morita, H., Takamata, A., Ogino, T. and Murakami, M. (2011). Mn-bicine: a low affinity chelate for manganese ion enhanced MRI. *Magn. Reson. Med.* **65**, 1005-1012.
- Seo, Y., Satoh, K., Morita, H., Takamata, A., Watanabe, K., Ogino, T. and Murakami, M. (2013). Mn-citrate and Mn-HIDA: intermediate-affinity chelates for manganese-enhanced MRI. *Contrast Media Mol. Imaging* **8**, 140-146.
- Seo, E., Ohishi, K., Maruyama, T., Imaizumi-Ohashi, Y., Murakami, M. and Seo, Y. (2014a). Testing the constant-volume hypothesis by magnetic resonance



- imaging of the mussel heart in the *Mytilus galloprovincialis*. *J. Exp. Biol.* **217**, 964-973.
- Seo, E., Ohishi, K., Maruyama, T., Imaizumi-Ohashi, Y., Murakami, M. and Seo, Y.** (2014b). Magnetic resonance imaging analysis of water flow in the mantle cavity of live *Mytilus galloprovincialis*. *J. Exp. Biol.* **217**, 2277-2287.
- Seo, E., Sazi, T., Togawa, M., Nagata, O., Murakami, M., Koima, S. and Seo, Y.** (2016). A portable infrared photoplethysmograph: heartbeat of *Mytilus galloprovincialis* analyzed by MRI and application to *Bathymodiulus septemdiarum*. *Biol. Open* **5**, 1752-1757.
- Soto, M. and Cajaraville, M. P.** (1966). Tissue and cell distribution of copper, zinc and cadmium in the mussel, *Mytilus galloprovincialis*, determined by autometallography. *Tissue Cell* **28**, 557-568.
- Thomsen, J., Himmerkus, N., Holland, N., Sartoris, F. J., Bleich, M. and Tresguerres, M.** (2016). Ammonia excretion in mytilid mussels is facilitated by ciliary beating. *J. Exp. Biol.* **219**, 2300-2310.
- Yang, H., Wang, T., Li, J., Gu, L. and Zheng, X.** (2006). Decreasing expression of  $\alpha_{1C}$  calcium L-type channel subunit mRNA in rat ventricular myocytes upon manganese exposure. *J. Biochem. Mol. Toxicol.* **20**, 159-166.
